# Supplementary material for: Acinetobacter baumannii Global Clone-Specific Resistomes Explored in Clinical Isolates Recovered from Egypt
Source: MDPI journal article supplement (doi:10.3390/antibiotics12071149), 2023-07-04
Supplement: s1 [file s1]

## Supplementary material

**Table S1.** SRA accessions and metadata of foreign strains included in the cgSNP-based phylogeny analysis.

| Strain                  | SRA         | Country   | Year | Specimen               | Oxford ST  | Pasteur ST |
|-------------------------|-------------|-----------|------|------------------------|------------|------------|
| <b>AYP-A2</b>           | SRR5891495  | Australia | 2013 | wound                  | 1806, 208  | 2          |
| <b>11A1213CRGN008</b>   | SRR5739056  | Canada    | 2012 | NA                     | 1806, 208  | 2          |
| <b>11A1314CRGN088</b>   | SRR5739066  | Canada    | 2013 | NA                     | 1806, 208  | 2          |
| <b>09A16CRGN003B</b>    | SRR5739115  | Canada    | 2016 | NA                     | 1806, 208  | 2          |
| <b>AB1251</b>           | SRR11589159 | Egypt     | 2013 | NA                     | 1816, 195  | 2          |
| <b>M17</b>              | SRR14102306 | Egypt     | 2020 | sputum                 | 1050, 2058 | 2          |
| <b>M18</b>              | SRR14102521 | Egypt     | 2020 | blood                  | 1078       | 85         |
| <b>A1829</b>            | SRR13327188 | Egypt     | 2018 | blood                  | NA         | NA         |
| <b>A1825</b>            | SRR13327192 | Egypt     | 2018 | bronchoalveolar lavage | 2246       | 113        |
| <b>A1824</b>            | SRR13327193 | Egypt     | 2018 | bronchoalveolar lavage | 1705       | 2          |
| <b>A1823</b>            | SRR13327194 | Egypt     | 2018 | bronchoalveolar lavage | 2246       | 113        |
| <b>A1819</b>            | SRR13327199 | Egypt     | 2018 | blood                  | 2805, 684  | 570        |
| <b>A1813</b>            | SRR13327205 | Egypt     | 2018 | blood                  | 1816, 195  | 2          |
| <b>M11</b>              | SRR14100602 | Egypt     | 2020 | Pleural fluid          | 1089       | 85         |
| <b>A1702</b>            | SRR13327208 | Egypt     | 2017 | blood                  | NA         | NA         |
| <b>B9</b>               | SRR15911746 | France    | NA   | Seine River            | 1806/208   | 2          |
| <b>AB1318</b>           | SRR11589121 | Israel    | 2014 | NA                     | 1806, 208  | 2          |
| <b>M012.6</b>           | SRR15973856 | Israel    | 2019 | NA                     | 1816, 195  | 2          |
| <b>AB1317</b>           | SRR11589122 | Israel    | 2014 | NA                     | 2054, 502  | 2          |
| <b>AB1181</b>           | SRR11589183 | Israel    | 2010 | NA                     | 1806, 208  | 604        |
| <b>AB1342</b>           | SRR11589278 | Israel    | 2014 | NA                     | 1808, 348  | 2          |
| <b>Ab105</b>            | SRR16951843 | Israel    | 2019 | blood                  | 1806, 208  | 2          |
| <b>AB1218</b>           | SRR11589173 | Jordan    | 2012 | NA                     | 1816, 195  | 2          |
| <b>nasal1</b>           | SRR15185780 | Jordan    | 2016 | Nasal swab             | 1806, 208  | 2          |
| <b>blood3</b>           | SRR15185781 | Jordan    | 2016 | blood                  | 499        | 158        |
| <b>ACN-20190830-N22</b> | SRR12905336 | Libya     | 2019 | wound                  | 440        | 25         |
| <b>ACN-20190830-N60</b> | SRR12905337 | Libya     | 2019 | wound                  | NA         | NA         |
| <b>ACN-20190830-N54</b> | SRR12905338 | Libya     | 2019 | blood                  | 2806, 286  | 2          |
| <b>ACN-20190830-N45</b> | SRR12905339 | Libya     | 2019 | throat swab            | NA         | NA         |
| <b>ACN-20190830-N27</b> | SRR12905341 | Libya     | 2019 | wound                  | 1806, 208  | 2          |
| <b>AbBAS-1</b>          | SRR12349738 | Spain     | 2019 | NA                     | 957        | 85         |
| <b>FDAARGOS_1360</b>    | SRR13674446 | USA       | NA   | NA                     | 1114, 1841 | 2          |
| <b>CFSAN0937</b>        | SRR9883198  | USA       | 2005 | NA                     | 1806, 208  | 2          |
| <b>ORAB01</b>           | SRR1819797  | USA       | 2012 | NA                     | 1806, 208  | 2          |
| <b>ABUH763</b>          | SRR3666894  | USA       | 2015 | NA                     | 1839, 281  | 2          |

**Table S2:** Metadata and STs of the isolates included in the current study

| Strain  | Specimen          | Oxford STs | Pasteur STs |
|---------|-------------------|------------|-------------|
| 20Y0020 | Endotracheal Tube | 208, 1806  | 2           |
| 20Y0021 | Blood             | 732        | 602         |
| 20Y0022 | Endotracheal Tube | 732        | 602         |
| 20Y0023 | Wound swab        | 281        | 2           |
| 20Y0024 | Endotracheal Tube | 281        | 2           |
| 20Y0025 | Catheter Tip      | 281        | 2           |
| 20Y0026 | Wound swab        | 281        | 2           |
| 20Y0028 | Blood             | 208, 1806  | 2           |
| 20Y0030 | Catheter Tip      | 208, 1806  | 2           |
| 20Y0031 | Endotracheal Tube | 208, 1806  | 2           |
| 20Y0032 | Sputum            | 208, 1806  | 2           |
| 20Y0033 | Endotracheal Tube | 1114, 1841 | 2           |
| 20Y0035 | Sputum            | 732        | 602         |
| 20Y0036 | Catheter Tip      | 281        | 2           |
| 20Y0037 | Sputum            | 684, 2805  | 570         |
| 20Y0038 | Blood             | 281        | 2           |
| 20Y0039 | Endotracheal Tube | 281        | 2           |
| 20Y0040 | Wound swab        | 281        | 2           |
| 20Y0041 | Sputum            | 684, 2805  | 570         |
| 20Y0042 | Endotracheal Tube | 208, 1806  | 2           |
| 20Y0043 | Wound swab        | 684, 2805  | 570         |
| 20Y0045 | Sputum            | 732        | 602         |
| 20Y0046 | Endotracheal Tube | 732        | 602         |
| 20Y0048 | Blood             | 2026, 2807 | 570         |
| 20Y0054 | Blood             | 208, 1806  | 604         |
| 20Y0055 | Blood             | 195, 1816  | 2           |
| 20Y0056 | Blood             | 195, 1816  | 2           |
| 20Y0057 | Blood             | 2808       | 85          |
| 20Y0058 | Sputum            | 732        | 602         |
| 20Y0059 | Blood             | 195, 1816  | 2           |
| 20Y0060 | Blood             | 195, 1816  | 2           |
| 20Y0062 | Blood             | 502, 2054  | 600         |
| 20Y0063 | Blood             | 1050, 2058 | 2           |
| 20Y0066 | Blood             | 2026, 2807 | 570         |
| 20Y0067 | Blood             | 2026, 2807 | 570         |
| 20Y0068 | Blood             | 195, 1816  | 2           |
| 20Y0070 | Blood             | 286, 2806  | 570         |
| 20Y0075 | Endotracheal Tube | 208, 1806  | 2           |
| 20Y0076 | Sputum            | 732        | 602         |
| 20Y0077 | Wound swab        | 2246       | 113         |
| 20Y0078 | Blood             | 1115       | 15          |
| 20Y0079 | Blood             | 1115       | 15          |
| 20Y0080 | Blood             | 1580       | 85          |
| 20Y0081 | Blood             | 732        | 602         |
| 20Y0082 | Blood             | 732        | 602         |
| 20Y0083 | Pus               | 1115       | 15          |

**Table S3:** Post-assembly metrics of the draft genomes generated in the current study

| ID      | # Contigs | GC (%) | Genome fraction (%) | L50 | N50     | Total Length (>= 0 bp) |
|---------|-----------|--------|---------------------|-----|---------|------------------------|
| 20Y0020 | 124       | 39.12  | 82.464              | 17  | 63,013  | 3,949,756              |
| 20Y0021 | 120       | 38.97  | 84.246              | 19  | 67,691  | 4,052,277              |
| 20Y0022 | 76        | 38.95  | 84.320              | 8   | 180,645 | 4,067,317              |
| 20Y0023 | 169       | 39.08  | 82.365              | 25  | 46,184  | 3,798,591              |
| 20Y0024 | 88        | 39.02  | 82.789              | 12  | 86,520  | 3,815,456              |
| 20Y0025 | 83        | 39.02  | 82.606              | 12  | 105,392 | 3,816,242              |
| 20Y0026 | 164       | 39.07  | 82.573              | 23  | 51,975  | 3,804,414              |
| 20Y0028 | 112       | 39.11  | 82.328              | 15  | 83,486  | 3,954,504              |
| 20Y0030 | 116       | 39.11  | 82.477              | 15  | 98,676  | 3,937,117              |
| 20Y0031 | 144       | 39.13  | 82.214              | 21  | 49,789  | 3,935,324              |
| 20Y0032 | 76        | 39.10  | 82.561              | 11  | 133,123 | 3,946,657              |
| 20Y0033 | 133       | 39.02  | 83.217              | 18  | 76,709  | 4,067,300              |
| 20Y0035 | 123       | 38.99  | 84.143              | 11  | 88,807  | 4,064,120              |
| 20Y0036 | 116       | 39.02  | 82.915              | 14  | 89,001  | 3,855,350              |
| 20Y0037 | 85        | 38.99  | 82.079              | 12  | 110,515 | 3,868,356              |
| 20Y0038 | 147       | 38.95  | 82.780              | 19  | 61,103  | 3,918,603              |
| 20Y0039 | 120       | 39.02  | 82.885              | 15  | 75,801  | 3,855,053              |
| 20Y0040 | 143       | 39.05  | 82.584              | 17  | 61,060  | 3,844,840              |
| 20Y0041 | 111       | 39.01  | 81.837              | 17  | 79,886  | 3,864,308              |
| 20Y0042 | 150       | 39.15  | 82.192              | 22  | 61,206  | 3,932,666              |
| 20Y0043 | 90        | 38.99  | 81.748              | 14  | 99,619  | 3,862,699              |
| 20Y0045 | 124       | 38.99  | 84.231              | 15  | 73,045  | 4,061,666              |
| 20Y0046 | 96        | 38.94  | 84.355              | 11  | 122,870 | 4,061,701              |
| 20Y0048 | 121       | 38.91  | 81.782              | 17  | 74,174  | 3,942,770              |
| 20Y0054 | 107       | 38.90  | 82.705              | 16  | 85,520  | 4,036,875              |
| 20Y0055 | 88        | 38.86  | 82.258              | 18  | 78,512  | 3,960,451              |
| 20Y0056 | 112       | 38.89  | 82.195              | 16  | 82,756  | 3,950,723              |
| 20Y0057 | 144       | 39.02  | 81.283              | 15  | 70,792  | 3,978,669              |
| 20Y0058 | 77        | 38.95  | 84.427              | 12  | 105,476 | 4,066,863              |
| 20Y0059 | 187       | 38.90  | 82.697              | 15  | 110,212 | 4,247,432              |
| 20Y0060 | 82        | 38.86  | 82.098              | 13  | 110,241 | 3,957,597              |
| 20Y0062 | 126       | 38.97  | 81.891              | 15  | 81,618  | 4,108,098              |
| 20Y0063 | 130       | 38.96  | 82.611              | 17  | 61,439  | 3,992,810              |
| 20Y0066 | 116       | 39.01  | 81.726              | 16  | 65,743  | 3,871,707              |
| 20Y0067 | 150       | 39.06  | 81.417              | 24  | 54,557  | 3,865,554              |
| 20Y0068 | 107       | 39.00  | 82.190              | 17  | 84,571  | 3,883,930              |
| 20Y0070 | 146       | 39.05  | 81.852              | 21  | 55,067  | 3,865,723              |
| 20Y0075 | 95        | 38.87  | 82.312              | 18  | 79,920  | 3,969,708              |
| 20Y0076 | 108       | 38.95  | 84.284              | 15  | 79,196  | 4,051,733              |
| 20Y0077 | 163       | 39.08  | 84.662              | 20  | 51,316  | 4,161,645              |
| 20Y0078 | 152       | 39.00  | 86.573              | 24  | 51,538  | 4,136,194              |
| 20Y0079 | 133       | 38.97  | 86.861              | 22  | 56,881  | 4,142,505              |
| 20Y0080 | 129       | 38.86  | 82.687              | 15  | 78,173  | 3,979,601              |
| 20Y0081 | 82        | 38.93  | 84.349              | 12  | 97,676  | 4,053,101              |
| 20Y0082 | 128       | 38.98  | 84.191              | 19  | 61,878  | 4,041,800              |
| 20Y0083 | 152       | 38.96  | 86.455              | 24  | 51,962  | 4,108,172              |

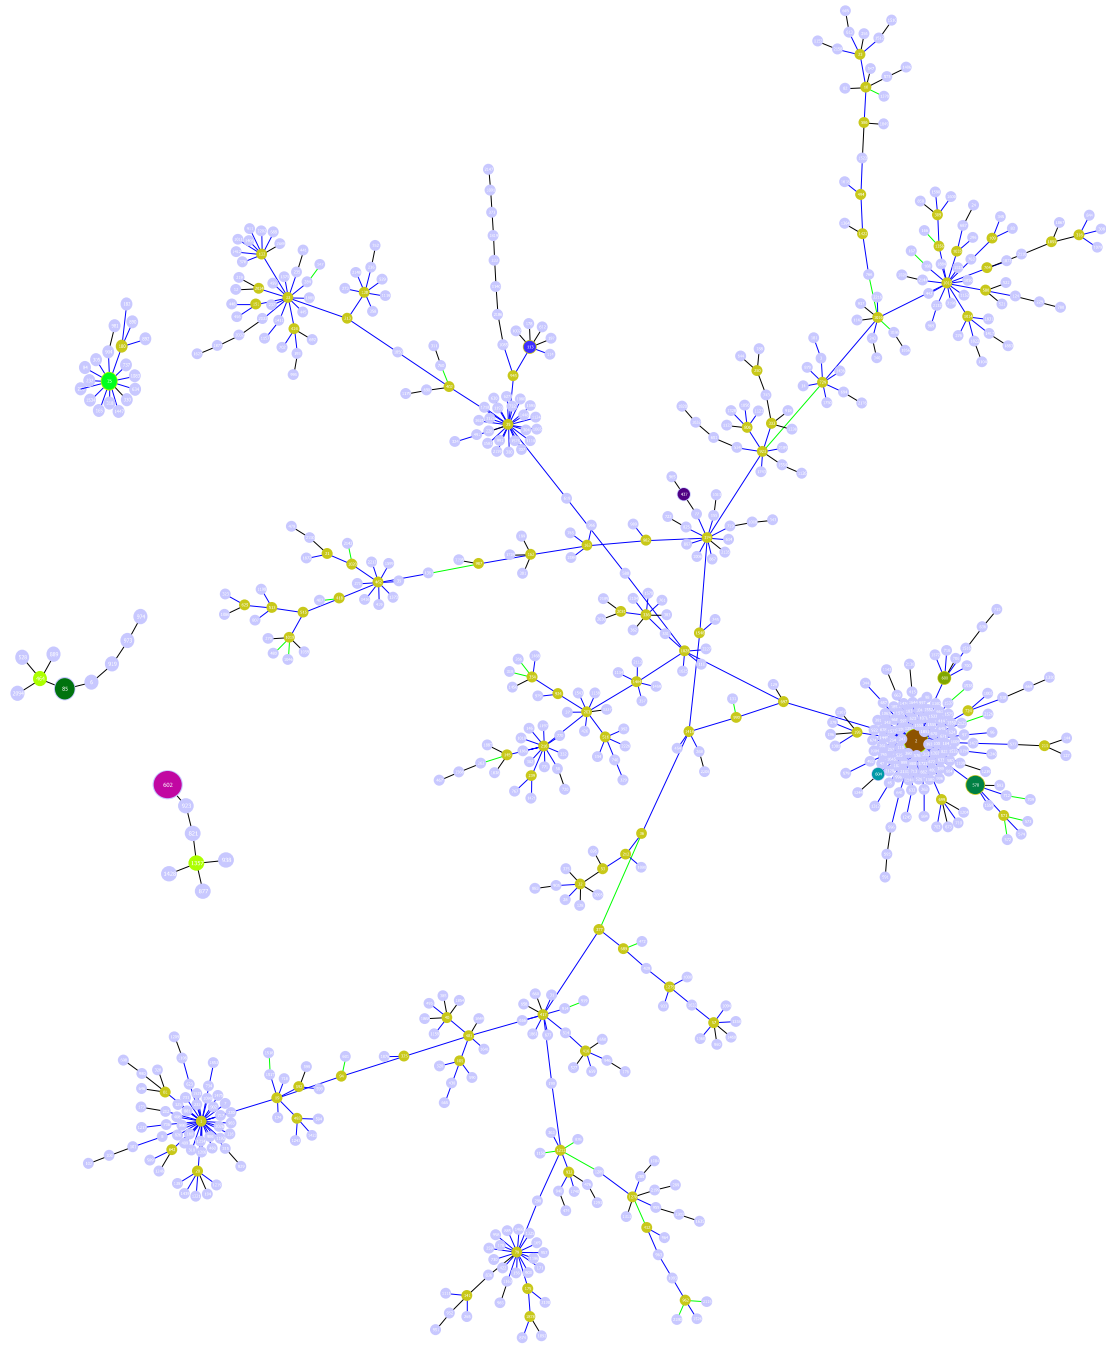

**Figure S1:** A minimum spanning tree based on Pasteur MLST typing scheme of *A. baumannii*. The numbers inside the circles refer to STs while light blue and light green circles correspond to STs in the database and clonal complexes, respectively. Circles of other colors correspond to the STs of the isolates sequenced in the current study.

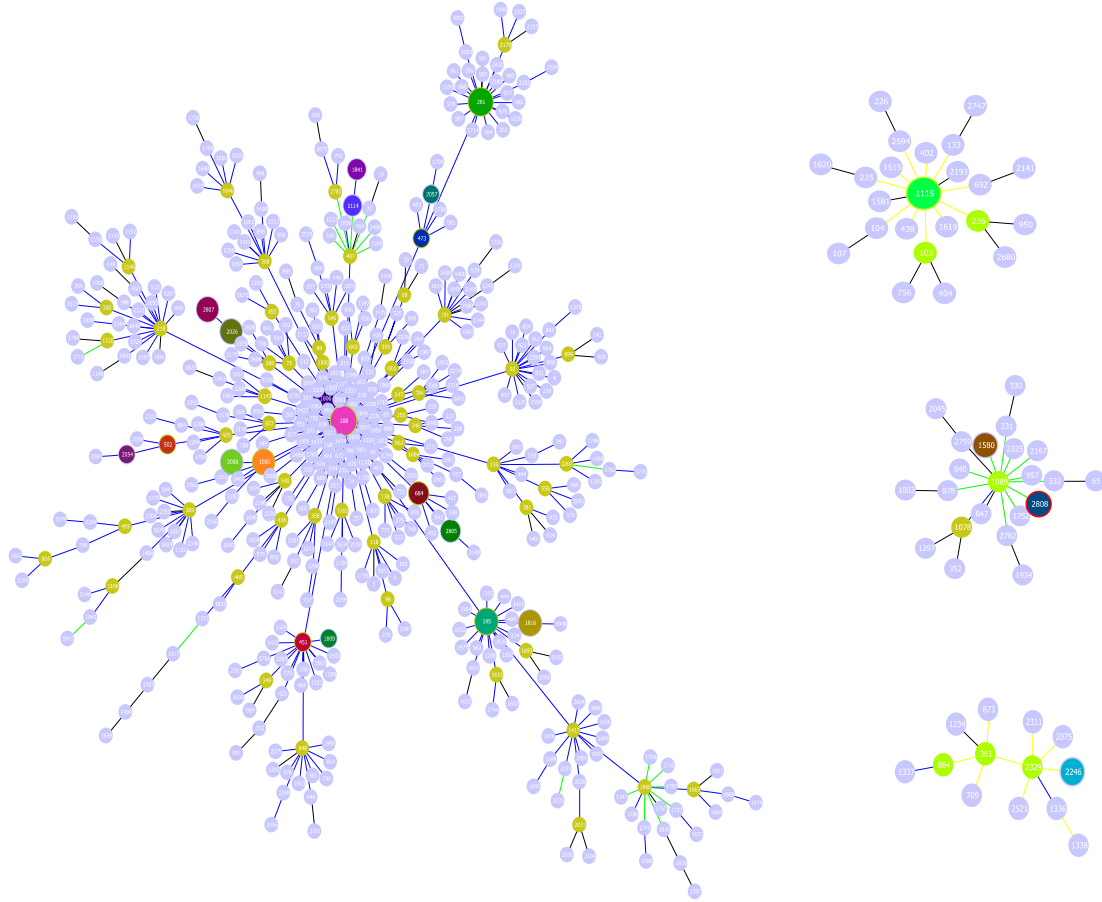

**Figure S2:** A minimum spanning tree based on Oxford MLST typing scheme of *A. baumannii*. The numbers inside the circles refer to STs while light blue and light green circles correspond to STs in the database and clonal complexes, respectively. Circles of other colors correspond to the STs of the isolates sequenced in the current study.

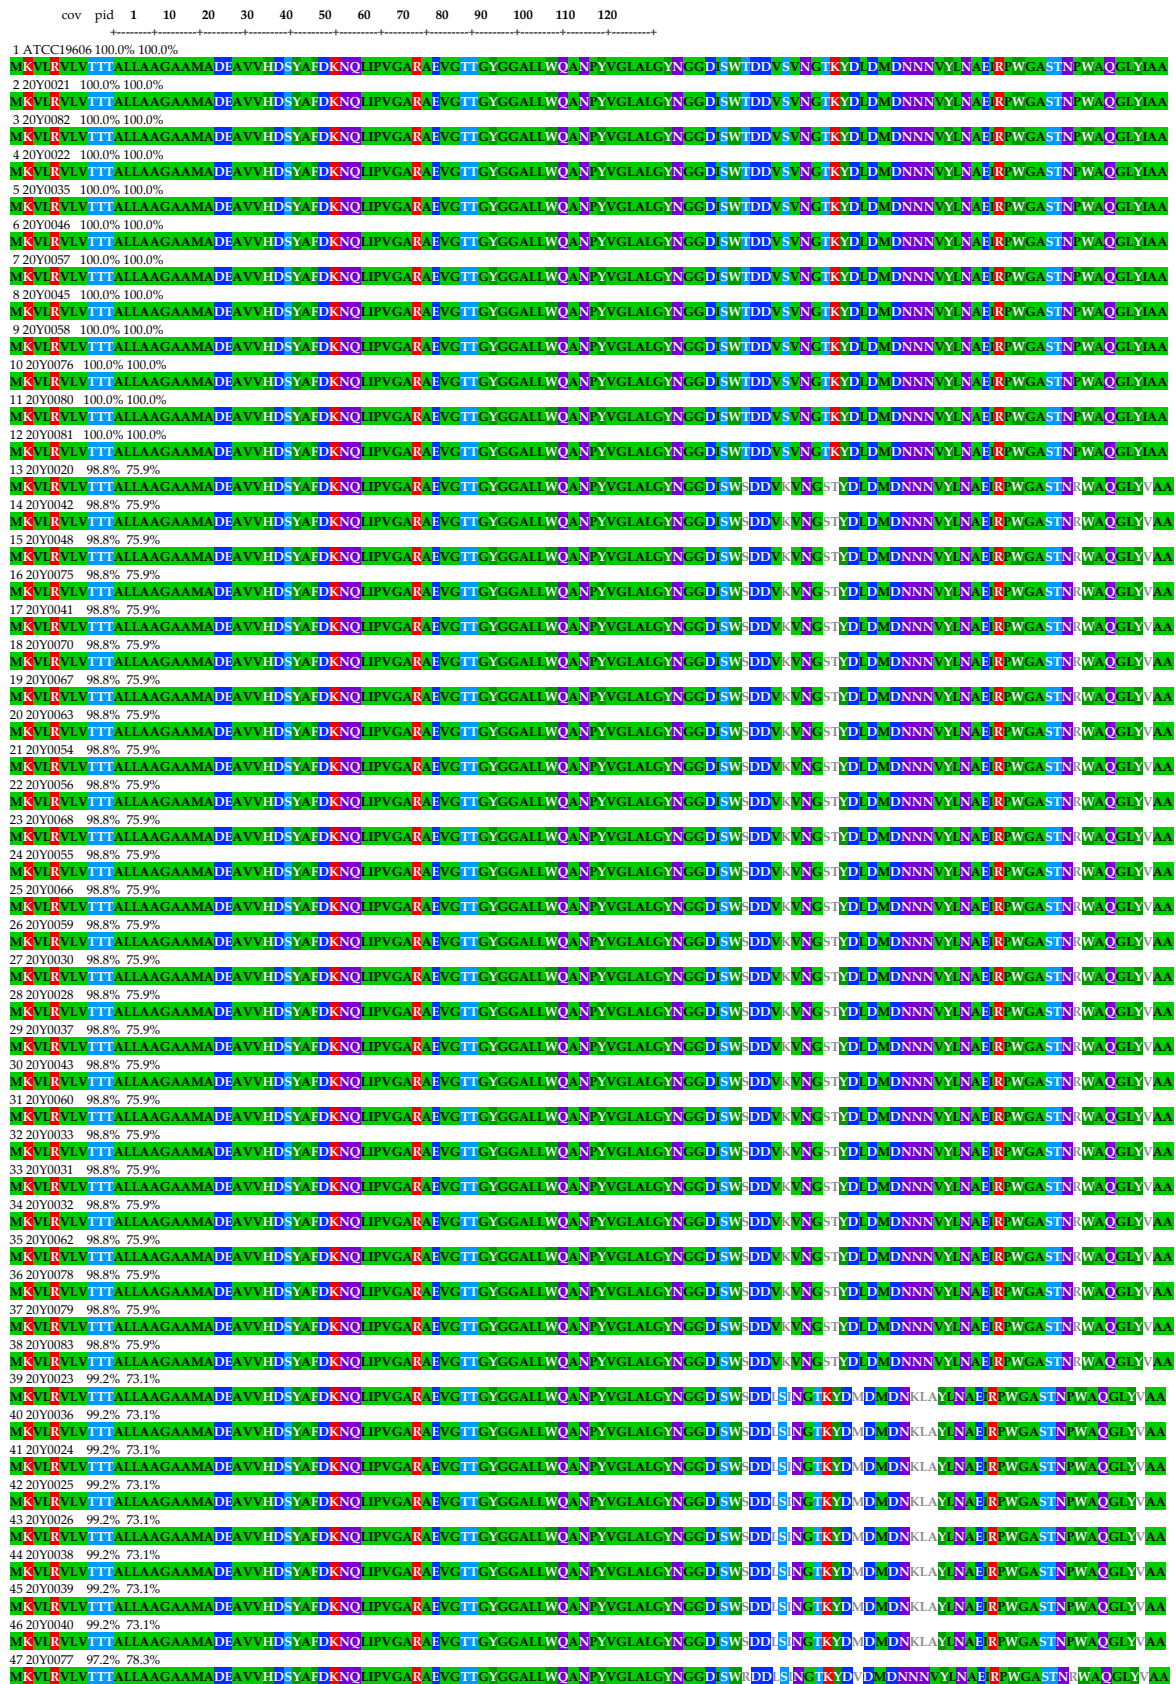



47 20Y0077 97.2% 78.3% **Q**A**A****Y****D****N****D****Y****D****H****R****S****S****D****E****H****K****N****E****T****N****Y**---SYN**E****S****N****E****Q****L****S****Y****K****N****D****A****D****Y****L****G****E****G****F****A****K****N****K****N****W****G****V****L****G****E****V****G****A****Y****T****C****N****T****E****D**KQGT-

**N**AAG**N****A**D**A**D**L**R**A****E****N****K****R****N****D****K****Y****K****W****L****V**



|             | cov    | pid    | 241     | 249             |
|-------------|--------|--------|---------|-----------------|
|             |        |        | ←-----→ |                 |
| 1 ATCC19606 | 100.0% | 100.0% | G       | K V G V N F Y W |
| 2 20Y0021   | 100.0% | 100.0% | G       | K V G V N F Y W |
| 3 20Y0082   | 100.0% | 100.0% | G       | K V G V N F Y W |
| 4 20Y0022   | 100.0% | 100.0% | G       | K V G V N F Y W |
| 5 20Y0035   | 100.0% | 100.0% | G       | K V G V N F Y W |
| 6 20Y0046   | 100.0% | 100.0% | G       | K V G V N F Y W |
| 7 20Y0057   | 100.0% | 100.0% | G       | K V G V N F Y W |
| 8 20Y0045   | 100.0% | 100.0% | G       | K V G V N F Y W |
| 9 20Y0058   | 100.0% | 100.0% | G       | K V G V N F Y W |
| 10 20Y0076  | 100.0% | 100.0% | G       | K V G V N F Y W |
| 11 20Y0080  | 100.0% | 100.0% | G       | K V G V N F Y W |
| 12 20Y0081  | 100.0% | 100.0% | G       | K V G V N F Y W |
| 13 20Y0020  | 98.8%  | 75.9%  | G       | K V G V N F Y W |
| 14 20Y0042  | 98.8%  | 75.9%  | G       | K V G V N F Y W |
| 15 20Y0048  | 98.8%  | 75.9%  | G       | K V G V N F Y W |
| 16 20Y0075  | 98.8%  | 75.9%  | G       | K V G V N F Y W |
| 17 20Y0041  | 98.8%  | 75.9%  | G       | K V G V N F Y W |
| 18 20Y0070  | 98.8%  | 75.9%  | G       | K V G V N F Y W |
| 19 20Y0067  | 98.8%  | 75.9%  | G       | K V G V N F Y W |
| 20 20Y0063  | 98.8%  | 75.9%  | G       | K V G V N F Y W |
| 21 20Y0054  | 98.8%  | 75.9%  | G       | K V G V N F Y W |
| 22 20Y0056  | 98.8%  | 75.9%  | G       | K V G V N F Y W |
| 23 20Y0068  | 98.8%  | 75.9%  | G       | K V G V N F Y W |
| 24 20Y0055  | 98.8%  | 75.9%  | G       | K V G V N F Y W |
| 25 20Y0066  | 98.8%  | 75.9%  | G       | K V G V N F Y W |
| 26 20Y0059  | 98.8%  | 75.9%  | G       | K V G V N F Y W |
| 27 20Y0030  | 98.8%  | 75.9%  | G       | K V G V N F Y W |
| 28 20Y0028  | 98.8%  | 75.9%  | G       | K V G V N F Y W |
| 29 20Y0037  | 98.8%  | 75.9%  | G       | K V G V N F Y W |
| 30 20Y0043  | 98.8%  | 75.9%  | G       | K V G V N F Y W |
| 31 20Y0060  | 98.8%  | 75.9%  | G       | K V G V N F Y W |
| 32 20Y0033  | 98.8%  | 75.9%  | G       | K V G V N F Y W |
| 33 20Y0031  | 98.8%  | 75.9%  | G       | K V G V N F Y W |
| 34 20Y0032  | 98.8%  | 75.9%  | G       | K V G V N F Y W |
| 35 20Y0062  | 98.8%  | 75.9%  | G       | K V G V N F Y W |
| 36 20Y0078  | 98.8%  | 75.9%  | G       | K V G V N F Y W |
| 37 20Y0079  | 98.8%  | 75.9%  | G       | K V G V N F Y W |
| 38 20Y0083  | 98.8%  | 75.9%  | G       | K V G V N F Y W |
| 39 20Y0023  | 99.2%  | 73.1%  | G       | K V G V N F Y W |
| 40 20Y0036  | 99.2%  | 73.1%  | G       | K V G V N F Y W |
| 41 20Y0024  | 99.2%  | 73.1%  | G       | K V G V N F Y W |
| 42 20Y0025  | 99.2%  | 73.1%  | G       | K V G V N F Y W |
| 43 20Y0026  | 99.2%  | 73.1%  | G       | K V G V N F Y W |
| 44 20Y0038  | 99.2%  | 73.1%  | G       | K V G V N F Y W |
| 45 20Y0039  | 99.2%  | 73.1%  | G       | K V G V N F Y W |
| 46 20Y0040  | 99.2%  | 73.1%  | G       | K V G V N F Y W |
| 47 20Y0077  | 97.2%  | 78.3%  | G       | K V G V N F Y W |

**Figure S3:** Multiple sequence alignment of the predicted amino acid sequences of CarO in all isolates compared to that of *A. baumannii* ATCC 19606. The alignment was visualized using MView version 1.63. cov, coverage; pid, percent identity.

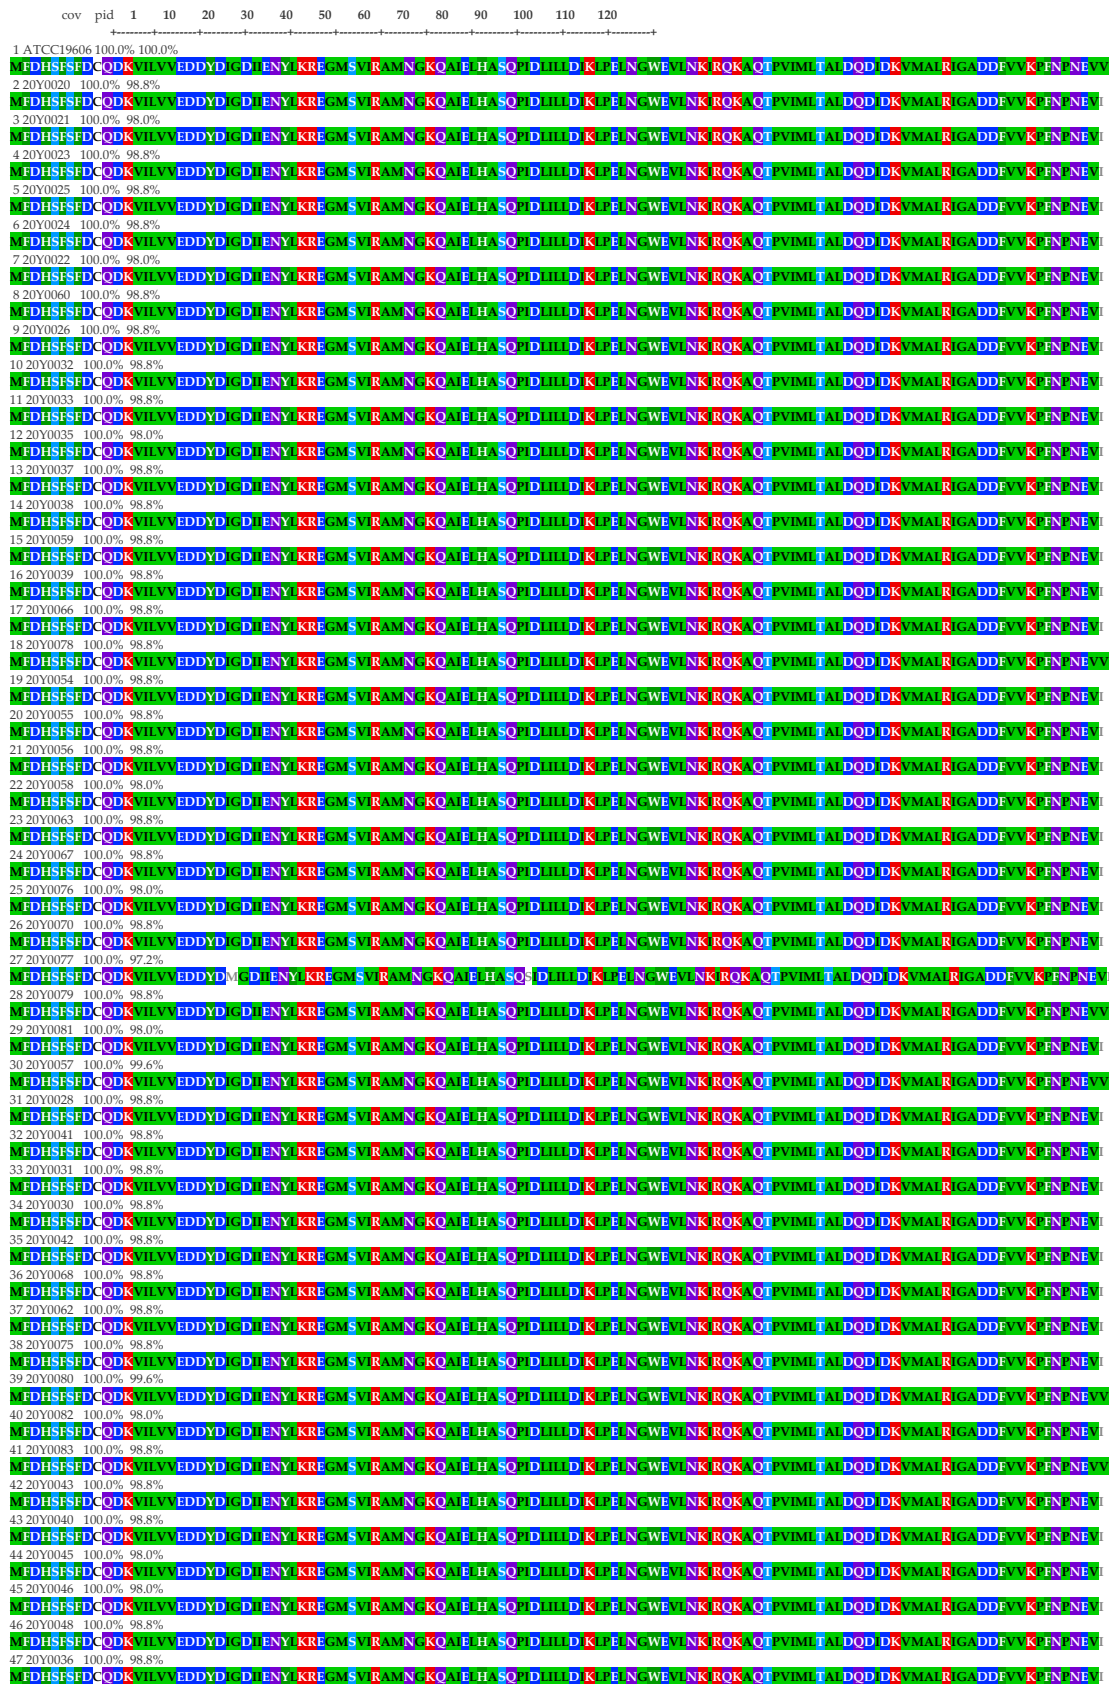

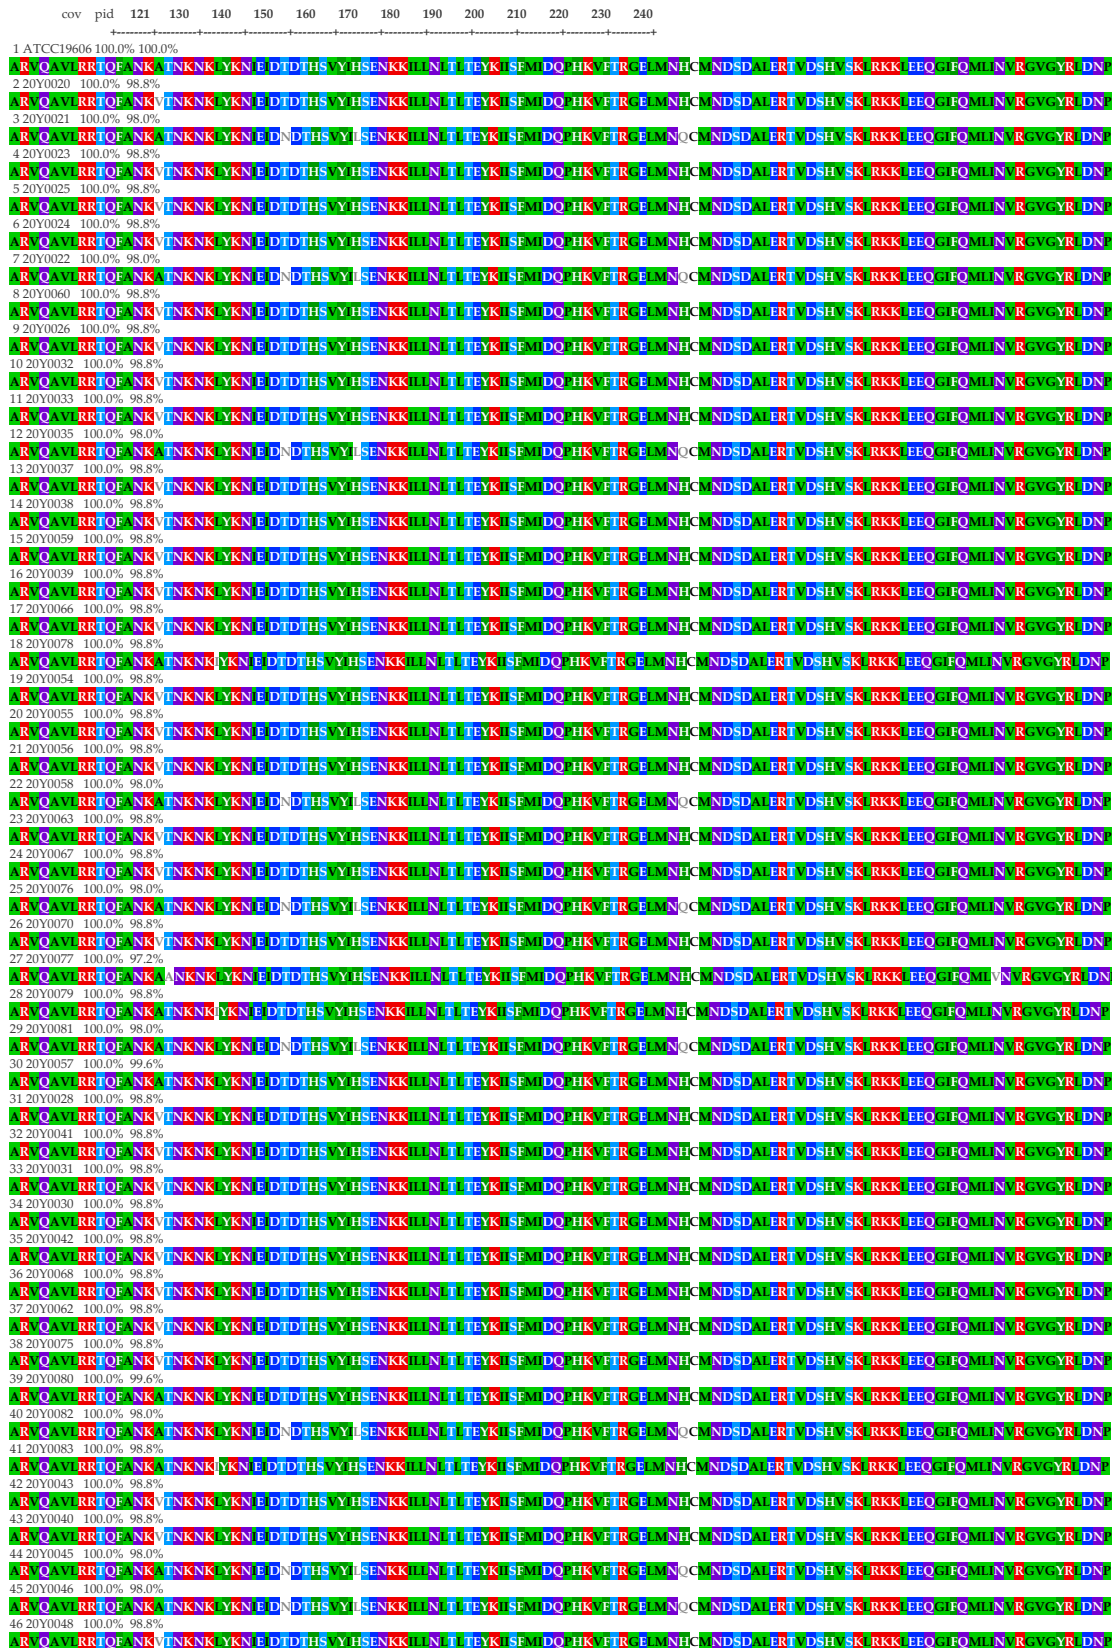

47 20Y0036 100.0% 98.8%

R Q A V L R R T Q F N K V I N K N K Y K N E D I D T H S Y H S E N K K I L N T I T E Y K I S E M D Q H K V F T R E L M N H C M N D S D M E R T V D S H Y S K I R K K E E Q G I F Q M L N V R G V G Y R D N

|             | cov    | pid    | 241     | 247 |   |
|-------------|--------|--------|---------|-----|---|
|             |        |        | ←-----→ |     |   |
| 1 ATCC19606 | 100.0% | 100.0% | P       | A   | V |
| 2 20Y0020   | 100.0% | 98.8%  | L       | A   | V |
| 3 20Y0021   | 100.0% | 98.0%  | L       | A   | V |
| 4 20Y0023   | 100.0% | 98.8%  | L       | A   | V |
| 5 20Y0025   | 100.0% | 98.8%  | L       | A   | V |
| 6 20Y0024   | 100.0% | 98.8%  | L       | A   | V |
| 7 20Y0022   | 100.0% | 98.0%  | L       | A   | V |
| 8 20Y0060   | 100.0% | 98.8%  | L       | A   | V |
| 9 20Y0026   | 100.0% | 98.8%  | L       | A   | V |
| 10 20Y0032  | 100.0% | 98.8%  | L       | A   | V |
| 11 20Y0033  | 100.0% | 98.8%  | L       | A   | V |
| 12 20Y0035  | 100.0% | 98.0%  | L       | A   | V |
| 13 20Y0037  | 100.0% | 98.8%  | L       | A   | V |
| 14 20Y0038  | 100.0% | 98.8%  | L       | A   | V |
| 15 20Y0059  | 100.0% | 98.8%  | L       | A   | V |
| 16 20Y0039  | 100.0% | 98.8%  | L       | A   | V |
| 17 20Y0066  | 100.0% | 98.8%  | L       | A   | V |
| 18 20Y0078  | 100.0% | 98.8%  | L       | K   | D |
| 19 20Y0054  | 100.0% | 98.8%  | L       | A   | V |
| 20 20Y0055  | 100.0% | 98.8%  | L       | A   | V |
| 21 20Y0056  | 100.0% | 98.8%  | L       | A   | V |
| 22 20Y0058  | 100.0% | 98.0%  | L       | A   | V |
| 23 20Y0063  | 100.0% | 98.8%  | L       | A   | V |
| 24 20Y0067  | 100.0% | 98.8%  | L       | A   | V |
| 25 20Y0076  | 100.0% | 98.0%  | L       | A   | V |
| 26 20Y0070  | 100.0% | 98.8%  | L       | A   | V |
| 27 20Y0077  | 100.0% | 97.2%  | L       | K   | D |
| 28 20Y0079  | 100.0% | 98.8%  | L       | A   | V |
| 29 20Y0081  | 100.0% | 98.0%  | L       | A   | V |
| 30 20Y0057  | 100.0% | 99.6%  | L       | A   | V |
| 31 20Y0028  | 100.0% | 98.8%  | L       | A   | V |
| 32 20Y0041  | 100.0% | 98.8%  | L       | A   | V |
| 33 20Y0031  | 100.0% | 98.8%  | L       | A   | V |
| 34 20Y0030  | 100.0% | 98.8%  | L       | A   | V |
| 35 20Y0042  | 100.0% | 98.8%  | L       | A   | V |
| 36 20Y0068  | 100.0% | 98.8%  | L       | A   | V |
| 37 20Y0062  | 100.0% | 98.8%  | L       | A   | V |
| 38 20Y0075  | 100.0% | 98.8%  | L       | A   | V |
| 39 20Y0080  | 100.0% | 99.6%  | L       | A   | V |
| 40 20Y0082  | 100.0% | 98.0%  | L       | A   | V |
| 41 20Y0083  | 100.0% | 98.8%  | L       | K   | D |
| 42 20Y0043  | 100.0% | 98.8%  | L       | A   | V |
| 43 20Y0040  | 100.0% | 98.8%  | L       | A   | V |
| 44 20Y0045  | 100.0% | 98.0%  | L       | A   | V |
| 45 20Y0046  | 100.0% | 98.0%  | L       | A   | V |
| 46 20Y0048  | 100.0% | 98.8%  | L       | A   | V |
| 47 20Y0036  | 100.0% | 98.8%  | L       | A   | V |

**Figure S4:** Multiple sequence alignment of the predicted amino acid sequences of AdeR in all isolates compared to that of *A. baumannii* ATCC 19606. The alignment was visualized using MView version 1.63. cov, coverage; pid, percent identity.



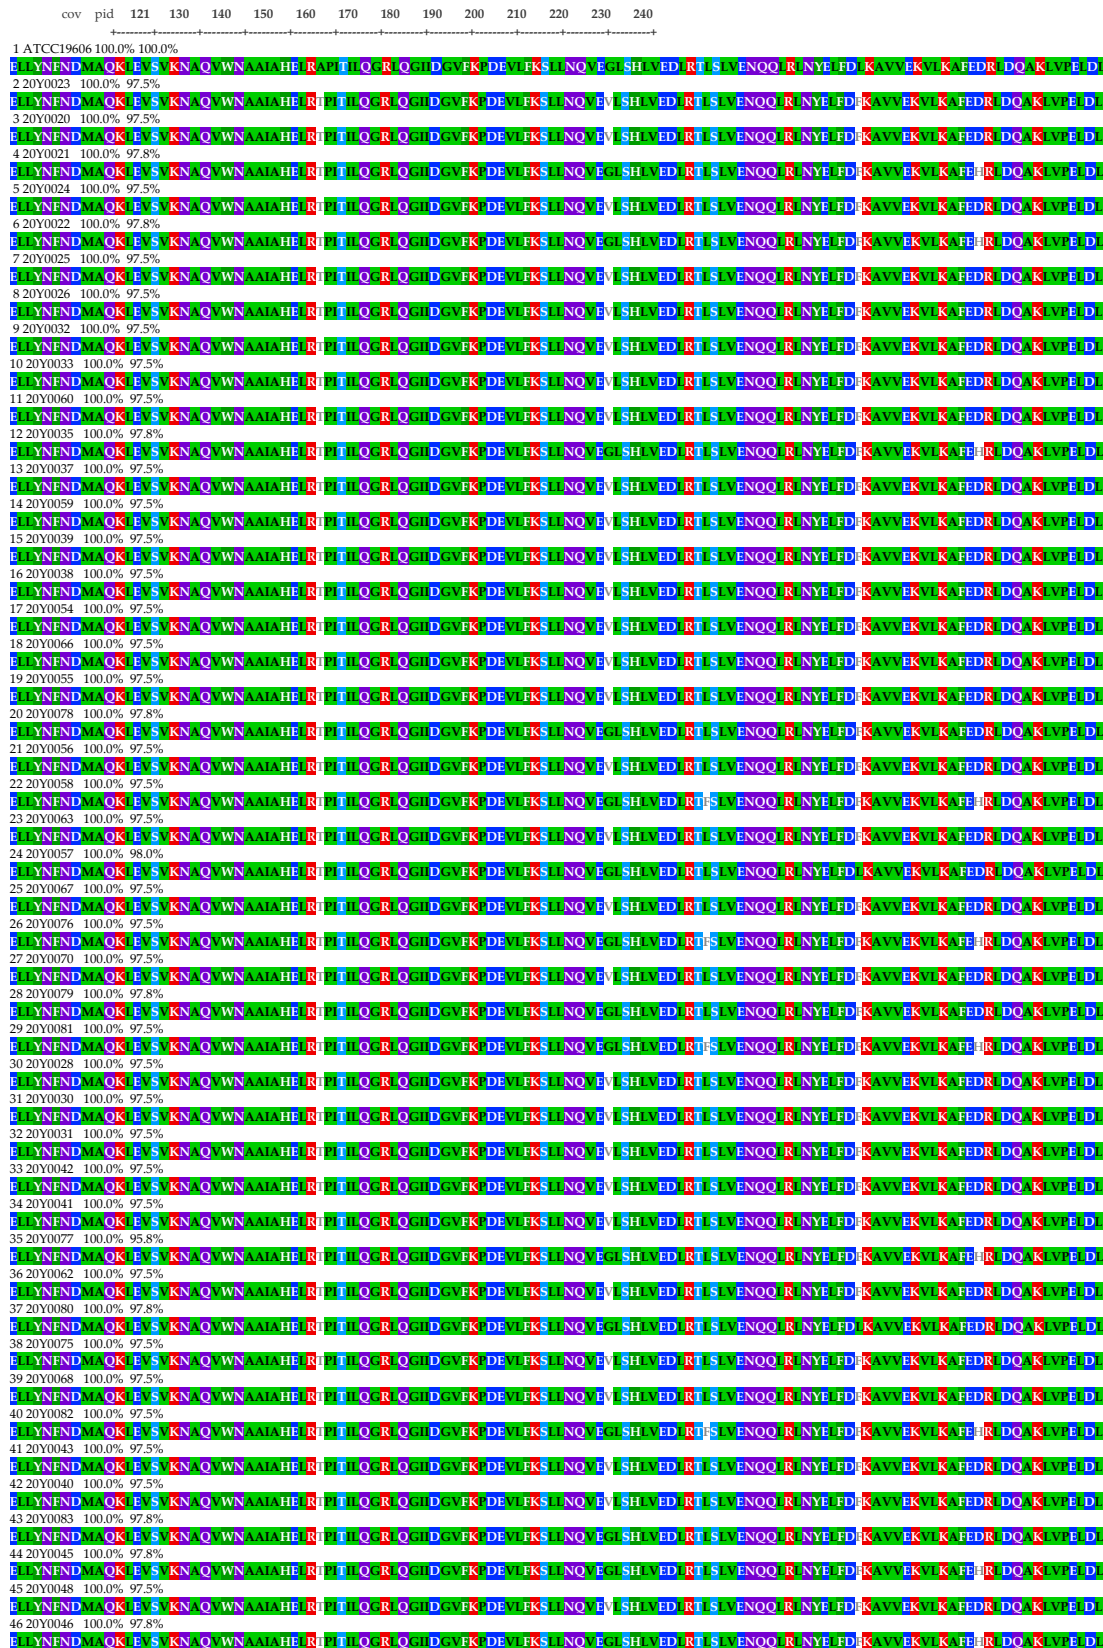

47 20Y0036 100.0% 97.5%

E L I Y N F N D M A Q K L E V S V K N A Q V W N A A I A H E R T L I I L Q G R Q G I D G V F K D E V I F K S I I N Q V E V S H I A E D R I L S A E N Q Q R N Y E F D R K A V V E K V I K A F E D R D Q K A V I E D I



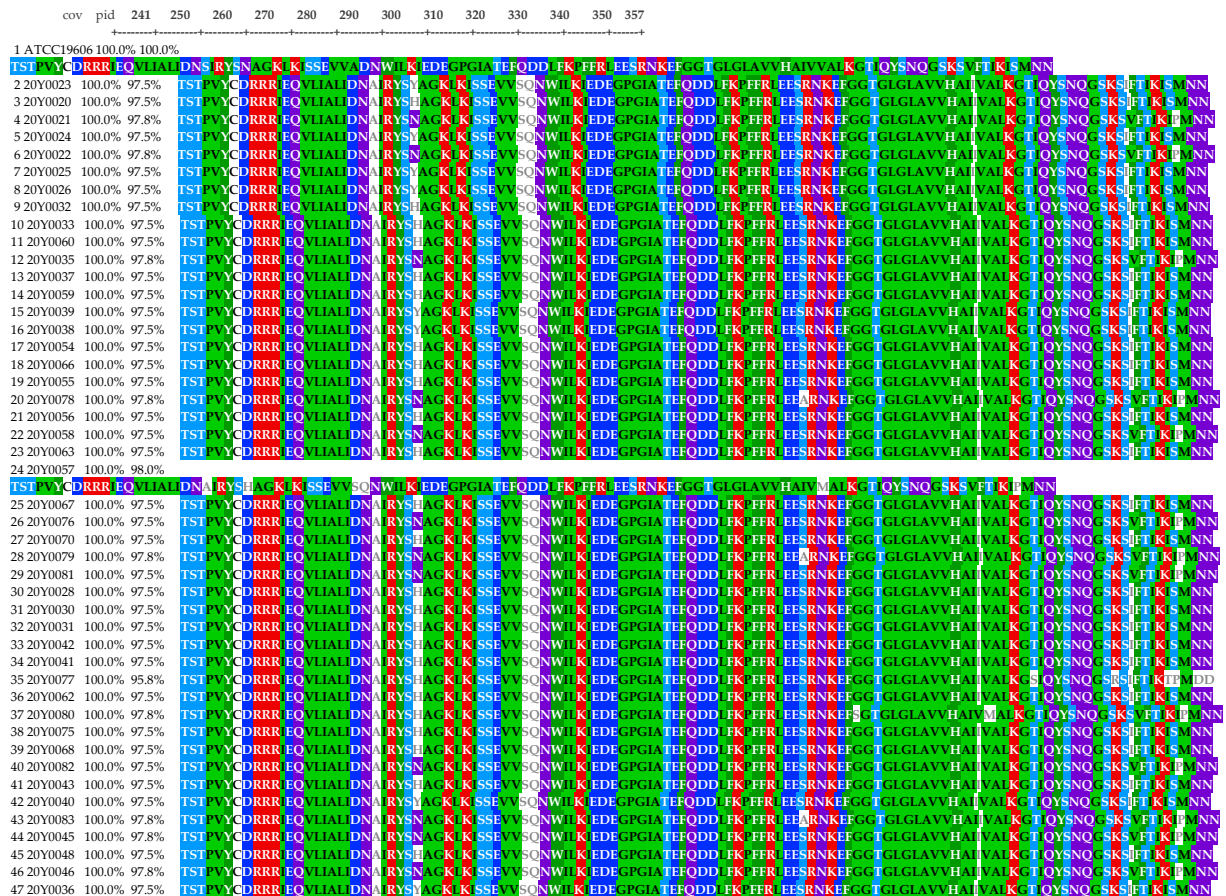

**Figure S5:** Multiple sequence alignment of the predicted amino acid sequences of AdeS in all isolates compared to that of *A. baumannii* ATCC 19606. The alignment was visualized using MView version 1.63. cov, coverage; pid, percent identity.

|    | cov       | pid    | 1      | 10 | 20 | 30 | 40 | 50 | 60 | 70 | 80 | 90 | 100 | 110 | 120 |  |
|----|-----------|--------|--------|----|----|----|----|----|----|----|----|----|-----|-----|-----|--|
| 1  | ATCC19606 | 100.0% | 100.0% |    |    |    |    |    |    |    |    |    |     |     |     |  |
| 2  | 20Y0024   | 100.0% | 100.0% |    |    |    |    |    |    |    |    |    |     |     |     |  |
| 3  | 20Y0056   | 100.0% | 100.0% |    |    |    |    |    |    |    |    |    |     |     |     |  |
| 4  | 20Y0055   | 100.0% | 100.0% |    |    |    |    |    |    |    |    |    |     |     |     |  |
| 5  | 20Y0063   | 100.0% | 100.0% |    |    |    |    |    |    |    |    |    |     |     |     |  |
| 6  | 20Y0077   | 100.0% | 99.6%  |    |    |    |    |    |    |    |    |    |     |     |     |  |
| 7  | 20Y0037   | 100.0% | 100.0% |    |    |    |    |    |    |    |    |    |     |     |     |  |
| 8  | 20Y0032   | 100.0% | 100.0% |    |    |    |    |    |    |    |    |    |     |     |     |  |
| 9  | 20Y0059   | 100.0% | 100.0% |    |    |    |    |    |    |    |    |    |     |     |     |  |
| 10 | 20Y0081   | 100.0% | 100.0% |    |    |    |    |    |    |    |    |    |     |     |     |  |
| 11 | 20Y0076   | 100.0% | 100.0% |    |    |    |    |    |    |    |    |    |     |     |     |  |
| 12 | 20Y0036   | 100.0% | 100.0% |    |    |    |    |    |    |    |    |    |     |     |     |  |
| 13 | 20Y0030   | 100.0% | 100.0% |    |    |    |    |    |    |    |    |    |     |     |     |  |
| 14 | 20Y0033   | 100.0% | 100.0% |    |    |    |    |    |    |    |    |    |     |     |     |  |
| 15 | 20Y0068   | 100.0% | 100.0% |    |    |    |    |    |    |    |    |    |     |     |     |  |
| 16 | 20Y0042   | 100.0% | 100.0% |    |    |    |    |    |    |    |    |    |     |     |     |  |
| 17 | 20Y0062   | 100.0% | 100.0% |    |    |    |    |    |    |    |    |    |     |     |     |  |
| 18 | 20Y0066   | 100.0% | 100.0% |    |    |    |    |    |    |    |    |    |     |     |     |  |
| 19 | 20Y0045   | 100.0% | 100.0% |    |    |    |    |    |    |    |    |    |     |     |     |  |
| 20 | 20Y0020   | 100.0% | 100.0% |    |    |    |    |    |    |    |    |    |     |     |     |  |
| 21 | 20Y0070   | 100.0% | 100.0% |    |    |    |    |    |    |    |    |    |     |     |     |  |
| 22 | 20Y0041   | 100.0% | 100.0% |    |    |    |    |    |    |    |    |    |     |     |     |  |
| 23 | 20Y0038   | 100.0% | 100.0% |    |    |    |    |    |    |    |    |    |     |     |     |  |
| 24 | 20Y0025   | 100.0% | 100.0% |    |    |    |    |    |    |    |    |    |     |     |     |  |
| 25 | 20Y0022   | 100.0% | 100.0% |    |    |    |    |    |    |    |    |    |     |     |     |  |
| 26 | 20Y0079   | 100.0% | 100.0% |    |    |    |    |    |    |    |    |    |     |     |     |  |
| 27 | 20Y0043   | 100.0% | 100.0% |    |    |    |    |    |    |    |    |    |     |     |     |  |
| 28 | 20Y0040   | 100.0% | 100.0% |    |    |    |    |    |    |    |    |    |     |     |     |  |
| 29 | 20Y0054   | 100.0% | 100.0% |    |    |    |    |    |    |    |    |    |     |     |     |  |
| 30 | 20Y0057   | 100.0% | 100.0% |    |    |    |    |    |    |    |    |    |     |     |     |  |
| 31 | 20Y0028   | 100.0% | 100.0% |    |    |    |    |    |    |    |    |    |     |     |     |  |
| 32 | 20Y0080   | 100.0% | 100.0% |    |    |    |    |    |    |    |    |    |     |     |     |  |
| 33 | 20Y0078   | 100.0% | 100.0% |    |    |    |    |    |    |    |    |    |     |     |     |  |
| 34 | 20Y0023   | 100.0% | 100.0% |    |    |    |    |    |    |    |    |    |     |     |     |  |
| 35 | 20Y0058   | 100.0% | 100.0% |    |    |    |    |    |    |    |    |    |     |     |     |  |
| 36 | 20Y0075   | 100.0% | 100.0% |    |    |    |    |    |    |    |    |    |     |     |     |  |
| 37 | 20Y0083   | 100.0% | 100.0% |    |    |    |    |    |    |    |    |    |     |     |     |  |
| 38 | 20Y0048   | 100.0% | 100.0% |    |    |    |    |    |    |    |    |    |     |     |     |  |
| 39 | 20Y0035   | 100.0% | 100.0% |    |    |    |    |    |    |    |    |    |     |     |     |  |
| 40 | 20Y0046   | 100.0% | 100.0% |    |    |    |    |    |    |    |    |    |     |     |     |  |
| 41 | 20Y0031   | 100.0% | 100.0% |    |    |    |    |    |    |    |    |    |     |     |     |  |
| 42 | 20Y0067   | 100.0% | 100.0% |    |    |    |    |    |    |    |    |    |     |     |     |  |
| 43 | 20Y0026   | 100.0% | 100.0% |    |    |    |    |    |    |    |    |    |     |     |     |  |
| 44 | 20Y0082   | 100.0% | 100.0% |    |    |    |    |    |    |    |    |    |     |     |     |  |
| 45 | 20Y0060   | 100.0% | 100.0% |    |    |    |    |    |    |    |    |    |     |     |     |  |
| 46 | 20Y0021   | 100.0% | 100.0% |    |    |    |    |    |    |    |    |    |     |     |     |  |
| 47 | 20Y0039   | 100.0% | 100.0% |    |    |    |    |    |    |    |    |    |     |     |     |  |

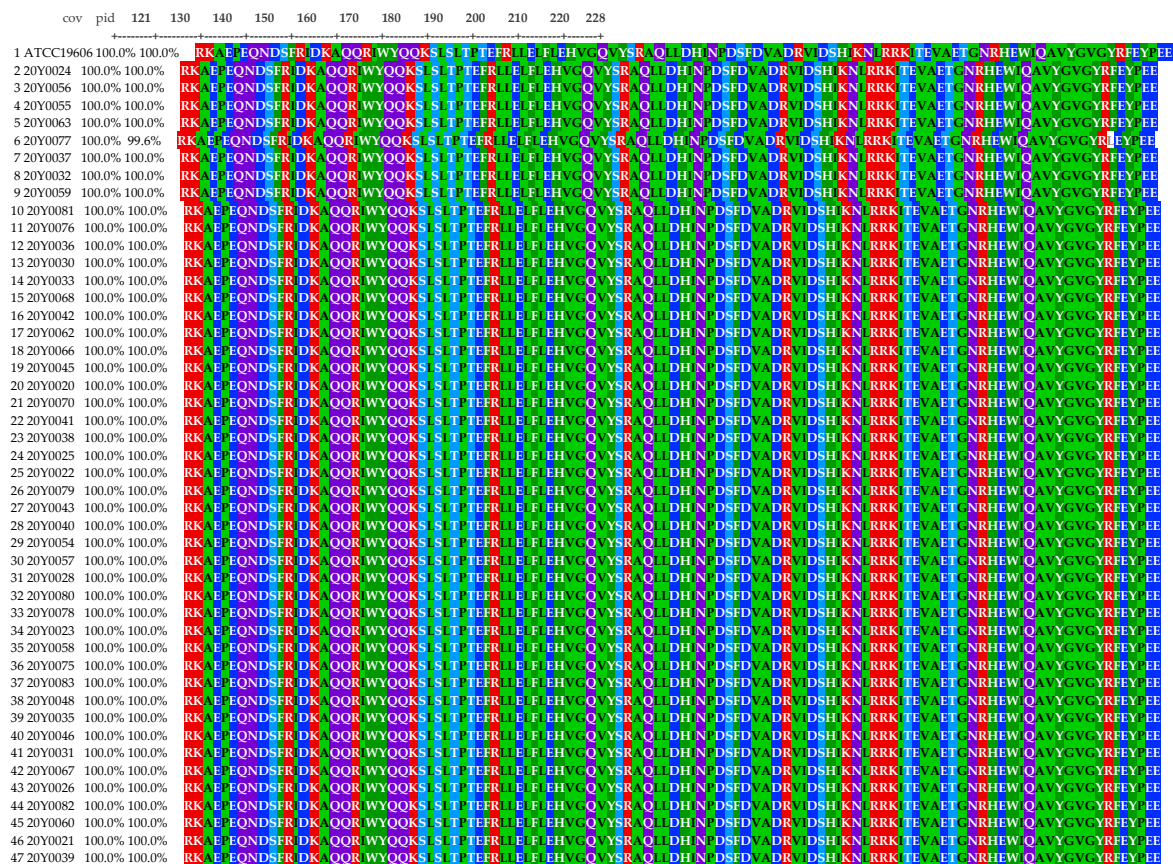

**Figure S6:** Multiple sequence alignment of the predicted amino acid sequences of BaeR in all isolates compared to that of *A. baumannii* ATCC 19606. The alignment was visualized using MView version 1.63. cov, coverage; pid, percent identity.









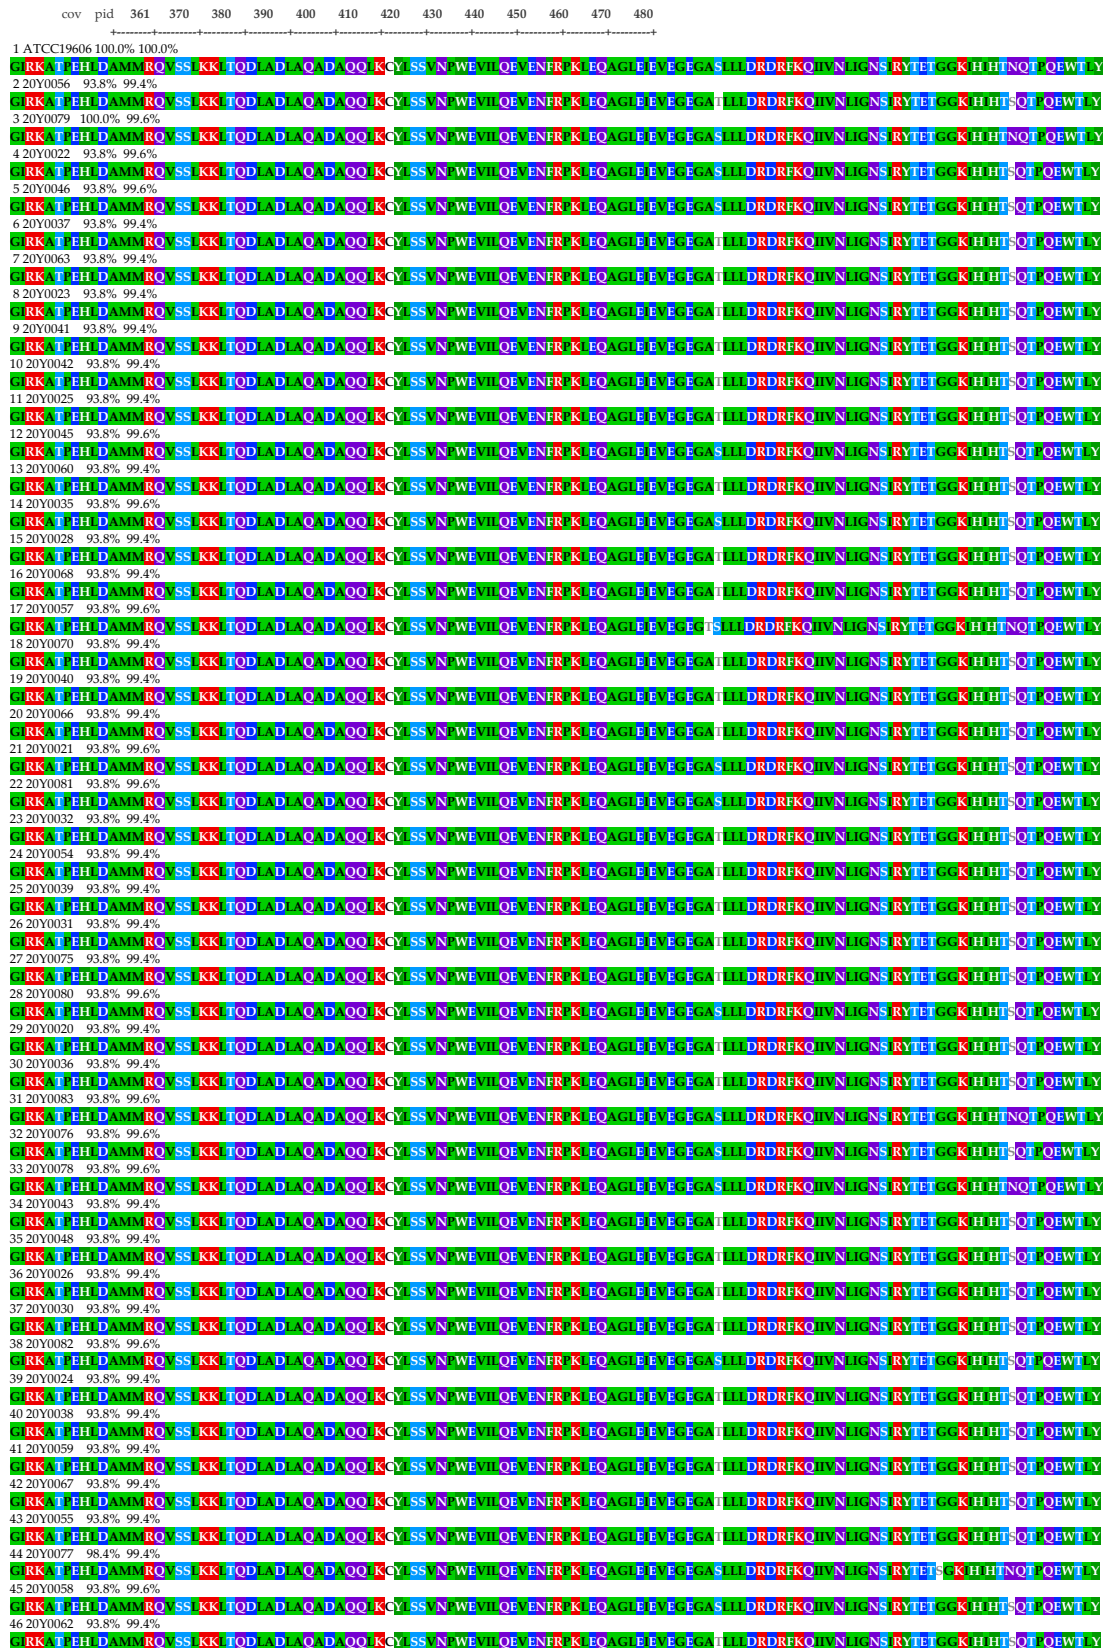

47 20Y0033 93.8% 99.4%

ERKATIEH DAMNRQSSKKITQDLDLQDAQQKCYSSNWEVILQEENFRKEQAGLEEVLEEGATLLDRDRFKQIVNIGNSRYTETGCKHHHSQIQEWLY



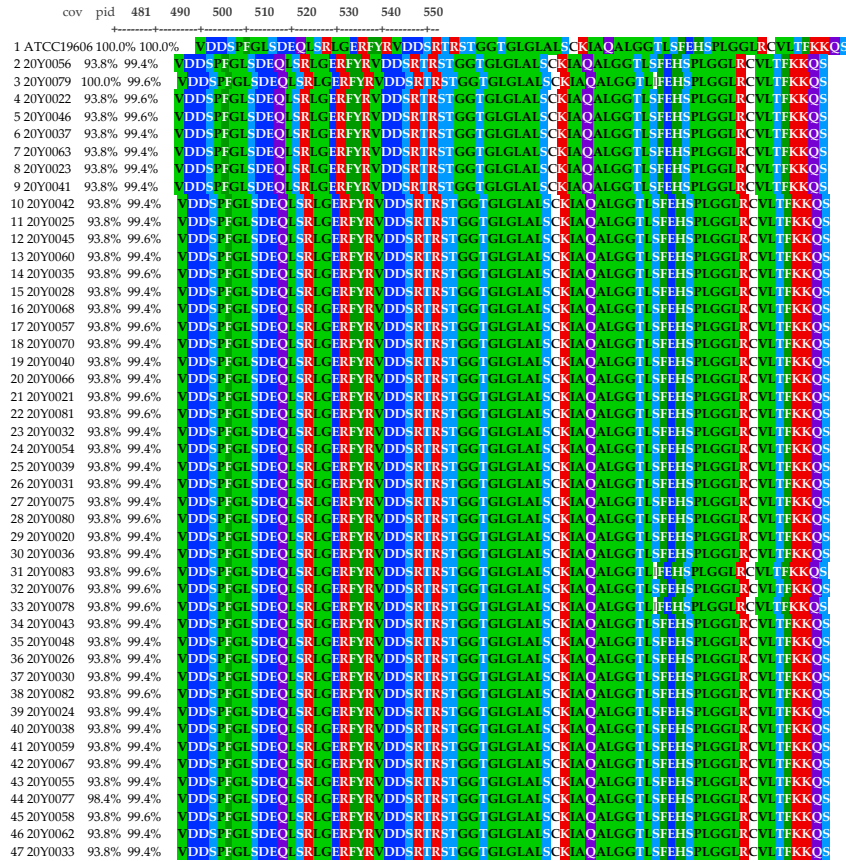

**Figure S7:** Multiple sequence alignment of the predicted amino acid sequences of BaeS in all isolates compared to that of *A. baumannii* ATCC 19606. The alignment was visualized using MView version 1.63. cov, coverage; pid, percent identity.

**Table S4:** Summary of mutations affecting *adeRS* and *baeRS* and correlation to tigecycline resistance

| Gene        | Codon | Wildtype | Mutation | No. of Affected Strains | GC                                 | TG <sup>R</sup> |
|-------------|-------|----------|----------|-------------------------|------------------------------------|-----------------|
| <i>adeR</i> | 24    | Ile      | Met      | 1                       | 7                                  | 100.0%          |
|             | 56    | Pro      | Ser      | 1                       | 7                                  | 100.0%          |
|             | 120   | Val      | Ile      | 41                      | All except 4 and 9                 | 75.6%           |
|             | 136   | Ala      | Val      | 31                      | 2                                  | 70.9%           |
|             | 137   | Thr      | Ala      | 1                       | 7                                  | 100.0%          |
|             | 142   | Leu      | Ile      | 3                       | 4                                  | 66.7%           |
|             | 150   | Thr      | Asn      | 9                       | 5                                  | 88.9%           |
|             | 158   | His      | Leu      | 9                       | 5                                  | 88.9%           |
|             | 195   | His      | Gln      | 9                       | 5                                  | 88.9%           |
|             | 228   | Ile      | Val      | 1                       | 7                                  | 100.0%          |
|             | 241   | Pro      | Leu      | 46                      | All                                | 74.0%           |
| <i>AdeS</i> | 243   | Val      | Ile      | 4                       | 4 and 7                            | 75.0%           |
|             | 153   | Ala      | Thr      | 46                      | All                                | 74.0%           |
|             | 186   | Gly      | Val      | 15                      | All except 2                       | 80.0%           |
|             | 197   | Leu      | Phe      | 4                       | Subset of GC5                      | 75.0%           |
|             | 214   | Leu      | Phe      | 44                      | All except 9                       | 75.0%           |
|             | 227   | Asp      | His      | 10                      | 5 and 7                            | 90.0%           |
|             | 263   | Ser      | Ala      | 46                      | All                                | 74.0%           |
|             | 268   | Asn      | His      | 26                      | Subset of GC2, GC9 and GC7         | 61.5%           |
|             |       |          | Tyr      | 8                       | Subset of GC2                      | 100.0%*         |
|             | 280   | Ala      | Ser      | 46                      | All                                | 74.0%           |
|             | 281   | Asp      | Gln      | 46                      | All                                | 74.0%           |
|             | 312   | Ser      | Ala      | 3                       | 4                                  | 66.7%           |
|             | 318   | Gly      | Ser      | 1                       | One isolate of GC9 (20Y0080)       | 0.0%            |
|             | 331   | Val      | Ile      | 44                      | All except GC9                     | 72.7%           |
|             | 332   | Val      | Met      | 2                       | 9                                  | 50.0%           |
|             | 337   | Thr      | Ser      | 1                       | 7                                  | 100.0%          |
|             | 346   | Lys      | Arg      | 1                       | 7                                  | 100.0%          |
|             | 348   | Val      | Ile      | 32                      | 2 and 7                            | 71.8%           |
|             | 353   | Ile      | Thr      | 1                       | 7                                  | 100.0%          |
|             | 354   | Ser      | Pro      | 15                      | All except GC2                     | 80.0%           |
|             | 356   | Asn      | Asp      | 1                       | 7                                  | 100.0%          |
|             | 357   | Asn      | Asp      | 1                       | 7                                  | 100.0%          |
| <i>baeR</i> | 223   | Phe      | Leu      | 1                       | 7                                  | 100.0%          |
| <i>baeS</i> | 10    | Leu      | Met      | 1                       | 7                                  | 100.0%          |
|             | 230   | Arg      | Gln      | 46                      | All                                | 74.0%           |
|             | 436   | Ala      | Thr      | 1                       | One GC9 isolate (20Y0057)          | 100.0%*         |
|             | 437   | Ser      | Thr      | 31                      | 2                                  | 70.9%           |
|             | 463   | Gly      | Ser      | 1                       | 7                                  | 100.0%          |
|             | 471   | Asn      | Ser      | 41                      | 5, 2 and one GC9 isolate (20Y0080) | 75.6%           |
|             | 533   | Ser      | Ile      | 3                       | 4                                  | 66.7%           |

\*Mutations were only found in TG-resistant but not in TG-sensitive strains of the same GC/ST.
